# Supplementary material for: Thermal transport and spin-dependent Seebeck effect in parallel step-like zigzag graphene nanoribbon junctions
Source: Royal Society of Chemistry journal article supplement (doi:10.1039/d0cp02732d), 2020-01-01
Supplement: d0cp02732d1.pdf [file d0cp02732d1.pdf]

**Supplemental Material for “Thermal Transport and  
Thermal Spin Transport of Step-like Graphene  
Nanoribbon Junctions”**

Xingyi Tan<sup>a</sup>, Lili Liu<sup>a</sup>, Gui-Fang Du<sup>b</sup> and Hua-Hua Fu<sup>\*b</sup>

*<sup>a</sup>Department of Physics, Chongqing Three Gorges University, Wanzhou, 404100, People’s  
Republic of China.*

*<sup>b</sup>School of Physics and Wuhan National High Magnetic Field Center, Huazhong University of  
Science and Technology, Wuhan 430074, People’s Republic of China*

\*E-mail: [hhfu@hust.edu.cn](mailto:hhfu@hust.edu.cn)

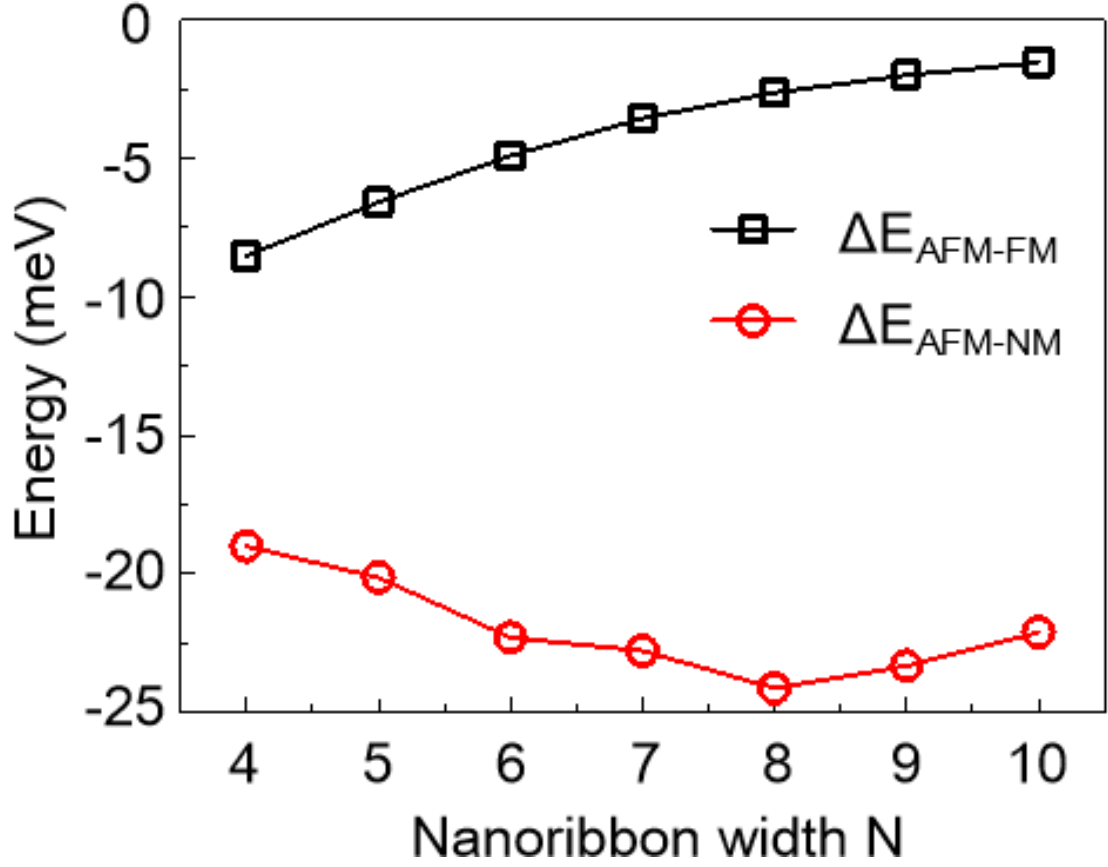

Fig. S1. The calculated values of the energy difference  $\Delta E_{\text{AFM-FM}} (= E_{\text{AFM}} - E_{\text{FM}})$  and  $\Delta E_{\text{AFM-NM}} (= E_{\text{AFM}} - E_{\text{NM}})$  for the parallel step-like GNR junctions with the different magnetic states, where  $E_{\text{AFM}}$ ,  $E_{\text{FM}}$  and  $E_{\text{NM}}$  denote the energy of the AFM, FM and NM state, respectively. Here, the nanoribbon width N in the right part of the GNR junctions is changed from 4 to 10.

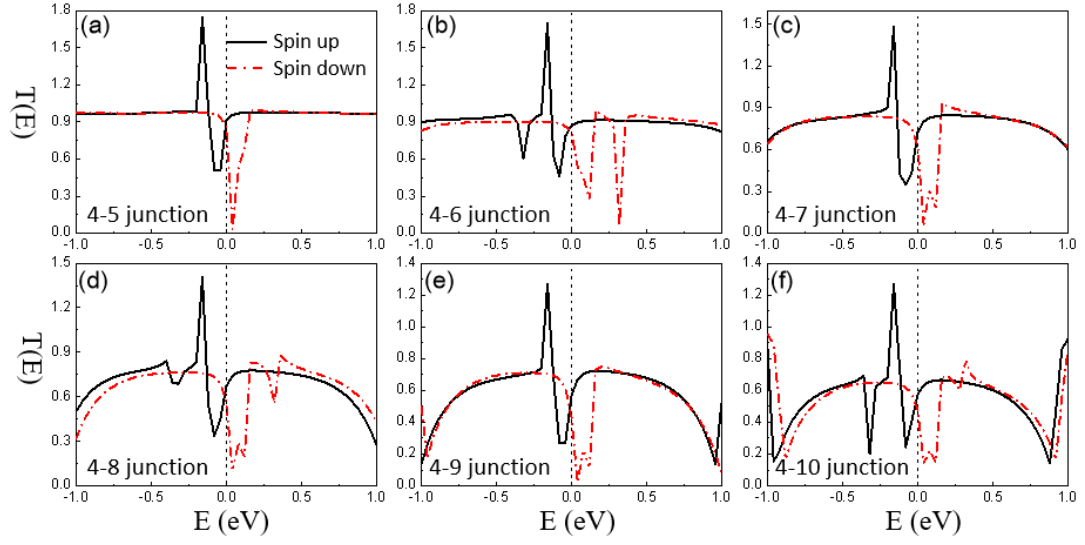

Fig. S2. The spin-dependent transmission spectra  $T(E)$ . The black line (red dotted line) illustrates the flowing direction of the spin-up (spin-down) transmission spectra, respectively, where the transmission is united by  $e^2/h$ . The figures (a)-(f) describe the numerical results for the GNR junctions from 4-5 to 4-10, respectively.

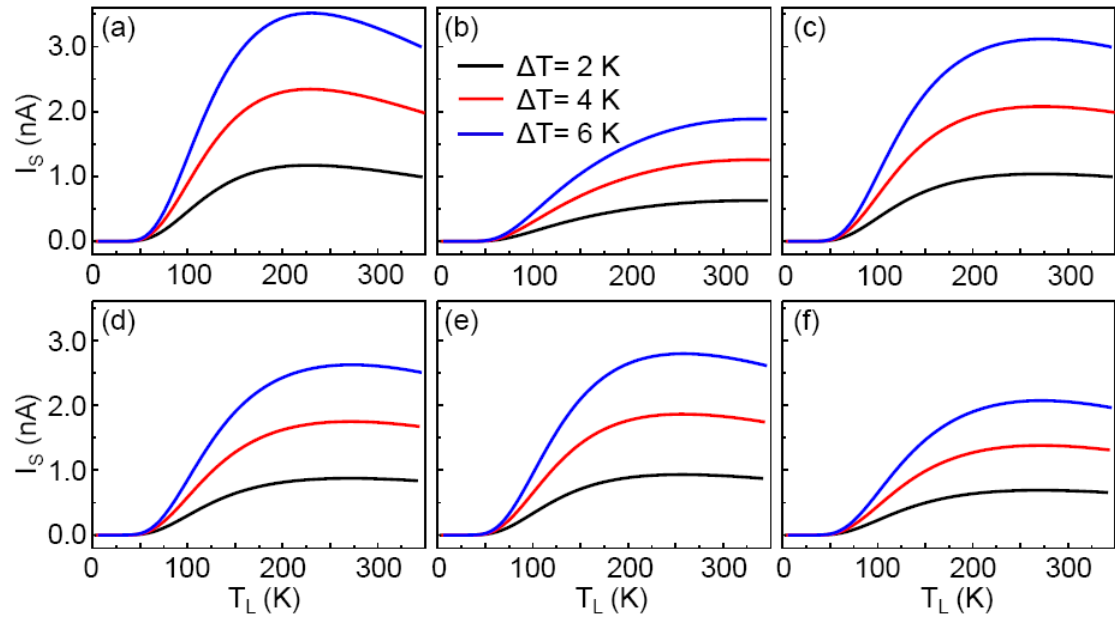

Fig. S3. The thermally driven net spin-dependent currents ( $I_s = I_{up} - I_{dn}$ ) as a function of the temperature  $T_L$ , where the temperature gradient  $\Delta T (= T_L - T_R)$  is set as 2, 4, 6 K. The figures (a)-(f) describe the numerical results for the GNR junctions from 4-5 to 4-10, respectively.
